# Supplementary material for: A Cost Overview of Minimally Invasive Total Mesorectal Excision in Rectal Cancer Patients: A Population-based Cohort in Experienced Centres
Source: PubMed Central journal article supplement — Ann Surg Open. 2023 Mar 7;4(1):e263. doi: 10.1097/AS9.0000000000000263 (PMC10431334; doi:10.1097/as9.0000000000000263), 2023-03-07
Supplement: as9-4-e263-s001.pdf [file as9-4-e263-s001.pdf]

Supplementary

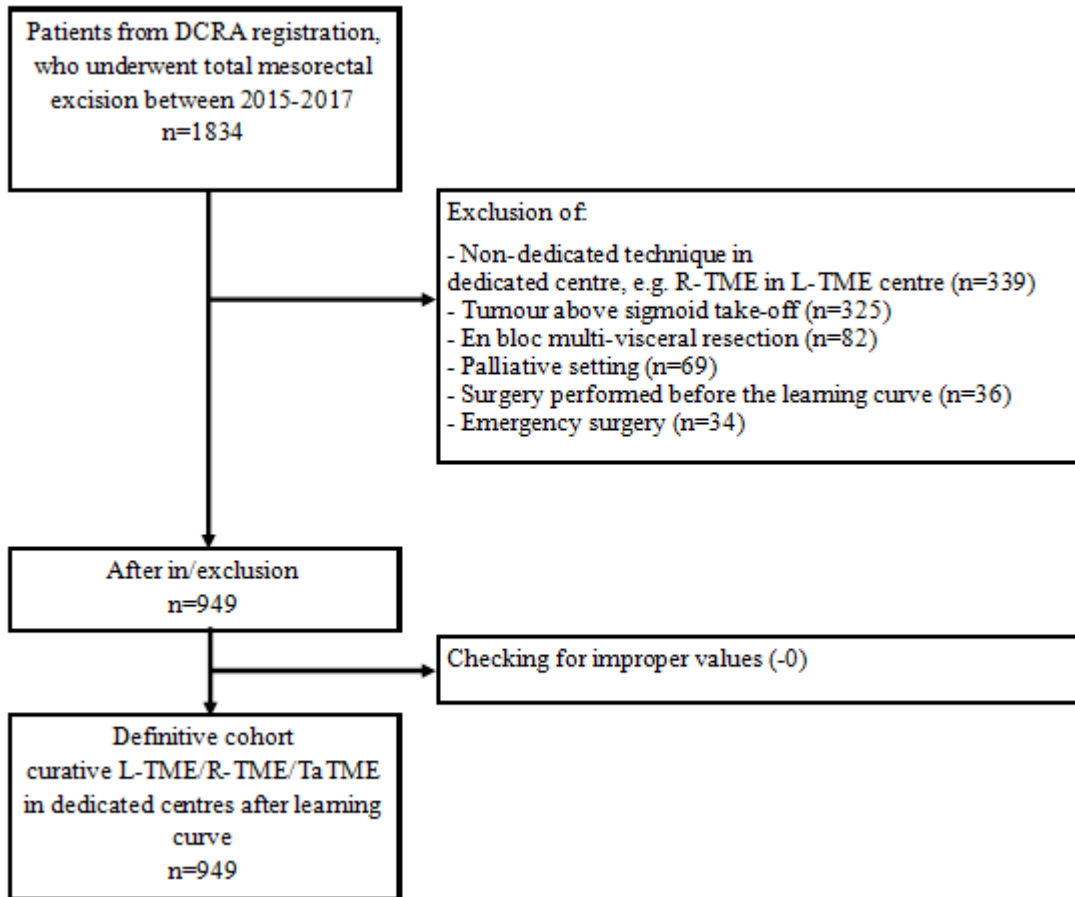

Figure 1 :Flowchart in- and exclusion criteria. Abbreviations: DCRA: Dutch Colorectal Audit, L-TME: laparoscopic total mesorectal excision, n: number of patients, R-TME: robot-assisted total mesorectal excision, TaTME: transanal total mesorectal excision
