# Supplementary material for: A Cost Overview of Minimally Invasive Total Mesorectal Excision in Rectal Cancer Patients: A Population-based Cohort in Experienced Centres
Source: PubMed Central journal article supplement — Ann Surg Open. 2023 Mar 7;4(1):e263. doi: 10.1097/AS9.0000000000000263 (PMC10431334; doi:10.1097/as9.0000000000000263), 2023-03-07
Supplement: as9-4-e263-s002.pdf [file as9-4-e263-s002.pdf]

| Pre-operative factors                               | Univariate |             |                  | Multivariable |             |                  |
|-----------------------------------------------------|------------|-------------|------------------|---------------|-------------|------------------|
|                                                     | Odds ratio | 95% CI      | P-value          | Odds Ratio    | 95% CI      | P-value          |
| Age (continuous, years)                             | 1.00       | (1.00-1.00) | 0.077            | 1.00          | (0.99-1.00) | 0.340            |
| BMI (continuous, per increasing kg/m <sup>2</sup> ) | 1.01       | (1.00-1.01) | 0.053            | 1.01          | (0.98-1.01) | 0.200            |
| Distance tumour to ARJ (continuous, centimetre)     | 1.00       | (0.99-1.00) | 0.322            | 1.00          | (0.99-1.01) | 0.375            |
| Tumour diameter (continuous, centimetre)            | 1.00       | (1.00-1.00) | 0.066            | 1.00          | (1.00-1.00) | 0.054            |
| Neoadjuvant therapy (yes vs. no)                    | 1.06       | (1.00-1.12) | <b>0.040</b>     | 1.06          | (1.00-1.12) | 0.064            |
| ASA 3-4 classification (yes vs. no)                 | 1.15       | (1.07-1.23) | <b>&lt;0.001</b> | 1.14          | (1.05-1.22) | <b>&lt;0.001</b> |

Table 1. Univariate and multivariable linear regression analysis of pre-operative factors predicting for total costs (adjusted for right skew by log transformation), Abbreviations: BMI, body mass index; CI, confidence interval; ASA, American Society of Anaesthesiologists; ARJ, Anorectal Junction

|                              |                     | <b>TaTME one-team</b>   | <b>TaTME two-team</b>   | <b>p-value</b>   |
|------------------------------|---------------------|-------------------------|-------------------------|------------------|
| n                            |                     | 73                      | 124                     |                  |
| Age, years                   |                     | 66.01 (9.74)            | 64.89 (10.93)           | 0.468            |
| Sex                          | Male                | 54 (74)                 | 82 (66)                 | 0.322            |
|                              | Female              | 19 (26)                 | 42 (34)                 |                  |
| BMI                          |                     | 25.51 (4.38)            | 26.38 (4.27)            | 0.173            |
| ASA-score                    | 1                   | 14 (19)                 | 24 (19)                 | 0.441            |
|                              | 2                   | 48 (66)                 | 76 (61)                 |                  |
|                              | 3                   | 10 (14)                 | 24 (19)                 |                  |
|                              | 4                   | 1 (1)                   | 0 (0)                   |                  |
| Tumour distance from ARJ, cm |                     | 4 [2; 6]                | 4 [2; 6]                | 0.525            |
| pT-stage                     | T1                  | 4 (5.5)                 | 4 (3)                   | 0.656            |
|                              | T2                  | 17 (23.3)               | 38 (31)                 |                  |
|                              | T3                  | 47 (64)                 | 75 (61)                 |                  |
|                              | T4                  | 4 (6)                   | 6 (5)                   |                  |
|                              | Tx                  | 1 (1)                   | 1 (1)                   |                  |
| Procedure                    | APR                 | 6 (8)                   | 18 (15)                 | 0.506            |
|                              | Hartmann            | 7 (10)                  | 24 (19)                 |                  |
|                              | LAR + anastomosis   | 60 (82)                 | 82 (66)                 |                  |
| Neoadjuvant therapy          |                     | 45 (62)                 | 79 (64)                 | 0.891            |
|                              | Radiotherapy        | 24 (33)                 | 35 (28)                 | 0.603            |
|                              | Chemo radiation     | 21 (29)                 | 44 (36)                 | 0.603            |
|                              | Chemotherapy        | 10 (14)                 | 19 (15)                 | 0.918            |
| Construction of stoma        | No stoma            | 29 (40)                 | 31 (25)                 | <b>0.030</b>     |
|                              | Deviating ileostomy | 31 (43)                 | 54 (44)                 |                  |
|                              | Deviating colostomy | 1 (1)                   | 0 (0)                   |                  |
|                              | Permanent stoma     | 12 (16)                 | 39 (31)                 |                  |
| OK time, minutes             |                     | 236 [198; 284]          | 170 [137; 226]          | <b>&lt;0.001</b> |
| Conversion                   |                     | 3 (4)                   | 2 (2)                   | 0.544            |
| Surgical complication        |                     | 21 (29)                 | 40 (32)                 | 0.725            |
| Clavien Dindo $\geq$ 3       |                     | 16 (22)                 | 33 (27)                 | 0.572            |
| Anastomotic leakage          |                     | 9 (15)                  | 18 (22)                 | 0.428            |
| 30-day re-intervention       |                     | 13 (18)                 | 29 (23)                 | 0.457            |
| 30-day readmission           |                     | 14 (19)                 | 17 (14)                 | 0.415            |
| ICU admission                |                     | 3 (4)                   | 5 (4)                   | 1.000            |
| ICU stay*, days              |                     | 5 [4; 7]                | 4 [3; 39]               | 1.000            |
| Length of stay, days         |                     | 6 [4; 9]                | 7 [4; 11]               | 0.602            |
| Operative costs, €           |                     | 10,170 [8,935; 11,280]  | 8,867 [7,479; 10,402]   | <b>0.002</b>     |
| Hospitalization costs, €     |                     | 2,929 [2,092; 4,603]    | 2,929 [2,092; 5,440]    | 0.578            |
| Complication costs*, €       |                     | 2,376 (1,504)           | 2,493 (2,084)           | 0.857            |
| Total costs, €               |                     | 13,328 [12,169; 16,587] | 12,620 [10,702; 15,994] | <b>0.044</b>     |

*Table 2. TaTME sub-analysis. All variables are in mean (SD), median [IQR] or number (%). Abbreviations: APR: abdominoperineal resection, ASA: American Society of Anaesthesiologists, BMI: body mass index, ICU: Intensive Care Unit, IQR: interquartile range, LAR: low anterior resection, pT-stage: pathological T-stage, SD: standard deviation, TaTME: transanal total mesorectal excision, \* = if occurred*
